# Supplementary material
Source: PubMed Central journal article supplement (PMC5972610)
Supplement: dey081suppl_figure1.pdf [file dey081suppl_figure1.pdf]

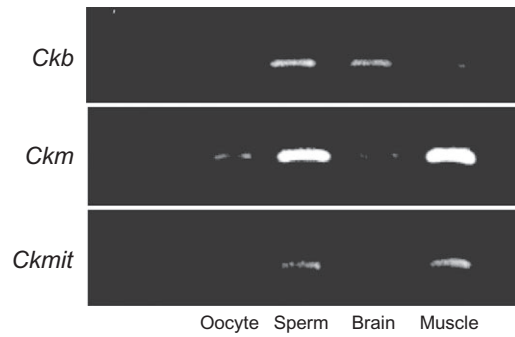

**Supplementary Figure S1** The expression of creatine kinase in sperm and oocyte. Because there are three types of brain-type creatine kinase (*Ckb*), muscle-type (*Ckm*) and mitochondria-type (*Ckmit*), the expression of creatine kinase was checked in sperm and oocytes. Oocytes were collected from oviduct at 16 hr after hCG stimulation. Sperm were collected from epididymis and incubated in HTF medium for 1 hr. Total RNA was recovered from oocyte, sperm, brain and muscle, and then used in the RT-PCR study. Brain and muscle were used as positive control.
