# Supplementary material
Source: PubMed Central journal article supplement (PMC5972610)
Supplement: dey081suppl_figure2.pdf [file dey081suppl_figure2.pdf]

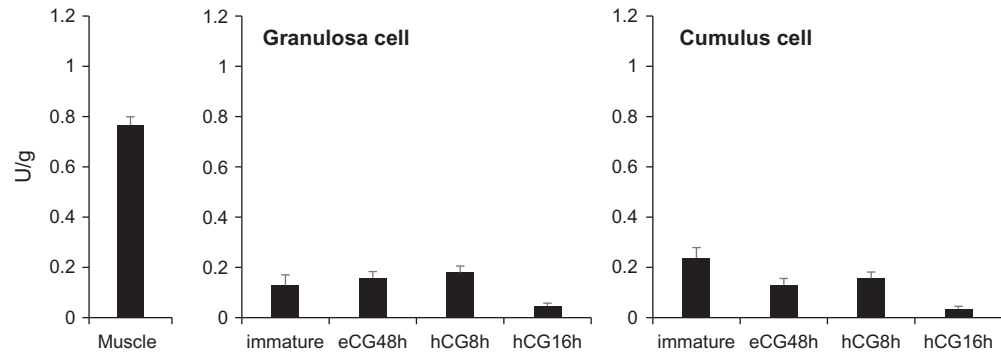

**Supplementary Figure S2** The activities of creatine kinase in granulosa cells and cumulus cells. The samples were collected after hormonal treatment. Muscle was used as positive control.
