# Supplementary material
Source: PubMed Central journal article supplement (PMC5972610)
Supplement: dey081suppl_table1.pdf [file dey081suppl_table1.pdf]

**Supplementary Table S1** List of primers employed for RT-PCR and the expected size.

| Gene         | Forward primer             | Reverse primer              | Size | Annealing temperature |
|--------------|----------------------------|-----------------------------|------|-----------------------|
| <i>L19</i>   | 5'-GGCATAGGGAAGAGGAAGG-3'  | 5'-GGATGTGCTCCATGAGGATGC-3' | 199  | 60                    |
| <i>Gatm</i>  | 5'-TGAAGACAAGGCCACCCATC-3' | 5'-GCATTTTCAGCTCTGCCCCAC-3' | 102  | 60                    |
| <i>Gamt</i>  | 5'-ATCTGCACAGAGGTGATGGC-3' | 5'-GTCACACTGAGGGACAGTGG-3'  | 188  | 60                    |
| <i>Ckb</i>   | 5'-TCAAGAGCATGACTGAGGCG-3' | 5'-TCTGCATGGAGATGACTCGC-3'  | 194  | 60                    |
| <i>Ckm</i>   | 5'-CACCCCTTCATGTGGAACGA-3' | 5'-CTCAAACCTGGGGTGCTTGC-3'  | 123  | 60                    |
| <i>Ckmit</i> | 5'-TTCAGCCTTCATCGTGACCC-3' | 5'-CTGGCGCAAGTCAGGA ACTA-3' | 103  | 60                    |

*L19*, ribosomal protein L19; *Gatm*, glycine amidinotransferase; *Gamt*, guanidinoacetate methyltransferase; *Ckb*, brain-type creatine kinase; *Ckm*, muscle-type creatine kinase; *Ckmit*, mitochondria-type creatine kinase.
